# Supplementary material for: MetaPhat: Detecting and decomposing multivariate associations from univariate genome-wide association statistics
Source: bioRxiv or medRxiv preprint supplement (doi:10.1101/661421), 2020-02-04
Supplement: Supplementary file [file media-1.pdf]

## Supplementary Data

MetaPhat: Detecting and decomposing multivariate associations from univariate genome-wide association statistics

Jake Lin<sup>1</sup>, Rubina Tabassum<sup>1</sup>, Samuli Ripatti<sup>1,2,3</sup>, Matti Pirinen<sup>1,2,4</sup>

1. Institute for Molecular Medicine Finland FIMM, HiLIFE, University of Helsinki, Helsinki, Finland.

2. Public Health, University of Helsinki, Helsinki, Finland.

3. Broad Institute of Massachusetts Institute of Technology and Harvard University, Cambridge, MA, USA.

4. Department of Mathematics and Statistics, University of Helsinki, Helsinki, Finland.

Contact: [jake.lin@helsinki.fi](mailto:jake.lin@helsinki.fi) and [matti.pirinen@helsinki.fi](mailto:matti.pirinen@helsinki.fi)

## Outline

|                                       |    |
|---------------------------------------|----|
| Introduction .....                    | 2  |
| Work flow .....                       | 2  |
| Data example .....                    | 3  |
| Decomposition .....                   | 4  |
| Computational performance .....       | 10 |
| Program arguments .....               | 11 |
| GWAS summary format and headers ..... | 12 |
| Prerequisites .....                   | 12 |
| Architecture and Performance .....    | 12 |
| References .....                      | 13 |

## Introduction

MetaPhat is an open source application to detect variants with multivariate associations by using summary statistics from univariate genome-wide association studies. The application also performs decomposition by finding statistically optimal subsets and driver traits for the multivariate associations. The results are visualized to gather novel insight and interpretation about multivariate associations. The code is written in Python 2.7+ (syntax consistent with Python 3) and R 3.4+ and is available at <https://sourceforge.net/projects/meta-pheno-association-tracer/>, and also includes installation instructions and test input data, described further below.

A high-level flow chart is shown in Figure S1. The component boxes outline the user input, quality control (QC) and trait correlation estimation, genome-wide testing, variant decomposition through iterative exclusion of traits and finally plotting. MetaPhat parameters and their descriptions are listed further below in the Program arguments section. Genome-wide significant variants are detected via integration of metaCCA implementation (Cichonska et al. 2016; <https://github.com/aalto-ics-kepaco/metaCCA>), that does multivariate testing based on canonical correlation analysis (Hotelling 1936). Our manuscript presents results for 21 heritable lipid species containing polyunsaturated fatty acids (Table S1) using their univariate GWAS summary statistics from Tabassum et al. 2018. The details of the decomposition procedure used for finding the optimal subset and driver traits for the identified variants including the *APOE* variant (rs7412), a known lipid-associated variant (Willer et al. 2013), are presented in Data example.

## Work flow

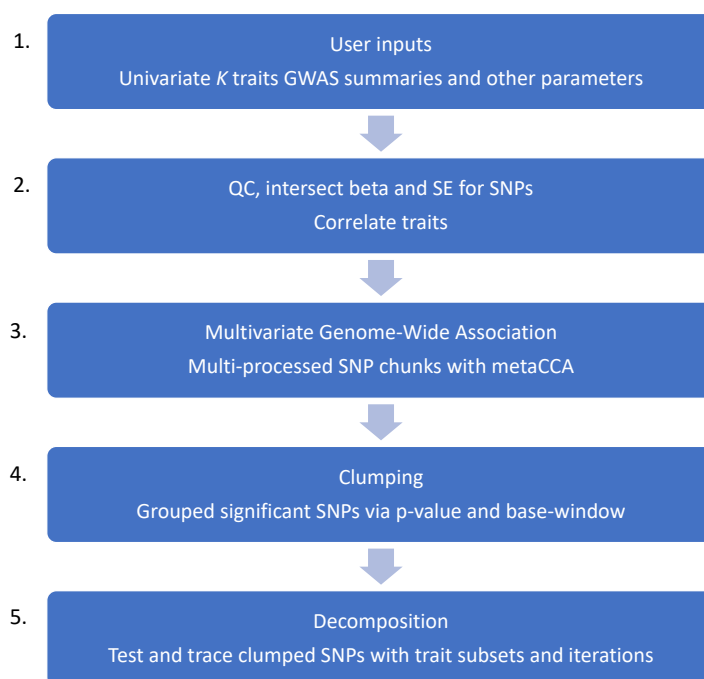

**Figure S1:** Workflow. 1. MetaPhat requires an input of a summary file defining multiple univariate GWAS summaries. 2. Quality control and trait correlation estimates are done. 3. Genome-wide association tests are performed on the full model with all traits included using metaCCA. The variants are divided into chunks and the association tests are performed in parallel using multiple processors, as defined in the inputs. 4. Significant variants are detected and clumped based on p-value and the given base-pair window size. 5. Decomposition is performed by finding statistically optimal traits and driver traits by tracing the highest and lowest p-values on trait subsets. MetaPhat has been tested on multiple platforms and suitable for cloud computing, more details are listed in the Architectures and Performance section.

## Data example

### 1. Heritable lipid species

We processed univariate GWAS summaries of 21 correlated lipid species with polyunsaturated fatty acids that were reported to exhibit high heritability (Tabassum et al. 2018). These summaries were generated using lipidomics data from 2,045 Finnish subjects with imputed genotypes available at ~8.5 million SNPs. The full lipid names and fatty acid chemical properties are listed in Table S1.

**Table S1: Human lipid measures used in MetaPhat analysis.** Polyunsaturated lipids species with acyl chains- C20:4 (14 lipids), C20:5 (3 lipids) and 22:6 (4 lipids) are reported to exhibit high heritability (Tabassum et al. 2018). As these lipids also demonstrate considerable correlations among themselves (shown in Figure S2), they are suitable for MetaPhat multivariate analysis and decomposition.

| Identifiers | Lipid classes                  | Lipid species       |
|-------------|--------------------------------|---------------------|
| CE14        | Cholesteryl ester              | CE(20:4;0)          |
| CE15        | Cholesteryl ester              | CE(20:5;0)          |
| CE17        | Cholesteryl ester              | CE(22:6;0)          |
| LPC8        | Lysophosphatidylcholines       | LPC(20:4;0)         |
| LPC9        | Lysophosphatidylcholines       | LPC(22:6;0)         |
| LPE5        | Lysophosphatidylethanolamine   | LPE(20:4;0)         |
| LPE6        | Lysophosphatidylethanolamine   | LPE(22:6;0)         |
| PC17        | Phosphatidylcholine            | PC(16:0;0-20:4;0)   |
| PC18        | Phosphatidylcholine            | PC(16:0;0-20:5;0)   |
| PC29        | Phosphatidylcholine            | PC(17:0;0-20:4;0)   |
| PC36        | Phosphatidylcholine            | PC(18:0;0-20:4;0)   |
| PC37        | Phosphatidylcholine            | PC(18:0;0-20:5;0)   |
| PC46        | Phosphatidylcholine            | PC(18:1;0-20:4;0)   |
| PC21        | Phosphatidylcholine            | PC(16:0;0-22:6;0)   |
| PCO7        | Phosphatidylcholine-ether      | PC-O(16:0;0-20:4;0) |
| PCO23       | Phosphatidylcholine-ether      | PC-O(18:0;0-20:4;0) |
| PCO29       | Phosphatidylcholine-ether      | PC-O(18:1;0-20:4;0) |
| PE7         | Phosphatidylethanolamine       | PE(18:0;0-20:4;0)   |
| PEO3        | Phosphatidylethanolamine-ether | PE-O(16:1;0-20:4;0) |
| PEO11       | Phosphatidylethanolamine-ether | PE-O(18:2;0-20:4;0) |
| PI9         | Phosphatidylinositol           | PI(18:0;0-20:4;0)   |

Correlations among the traits (Figure S2) are estimated via metaCCA (estimateSyy function) using the univariate beta coefficients across the traits as input. MetaPhat performs quality control to filter out variants that are not available for all traits and also automatically aligns the effects to a same allele.

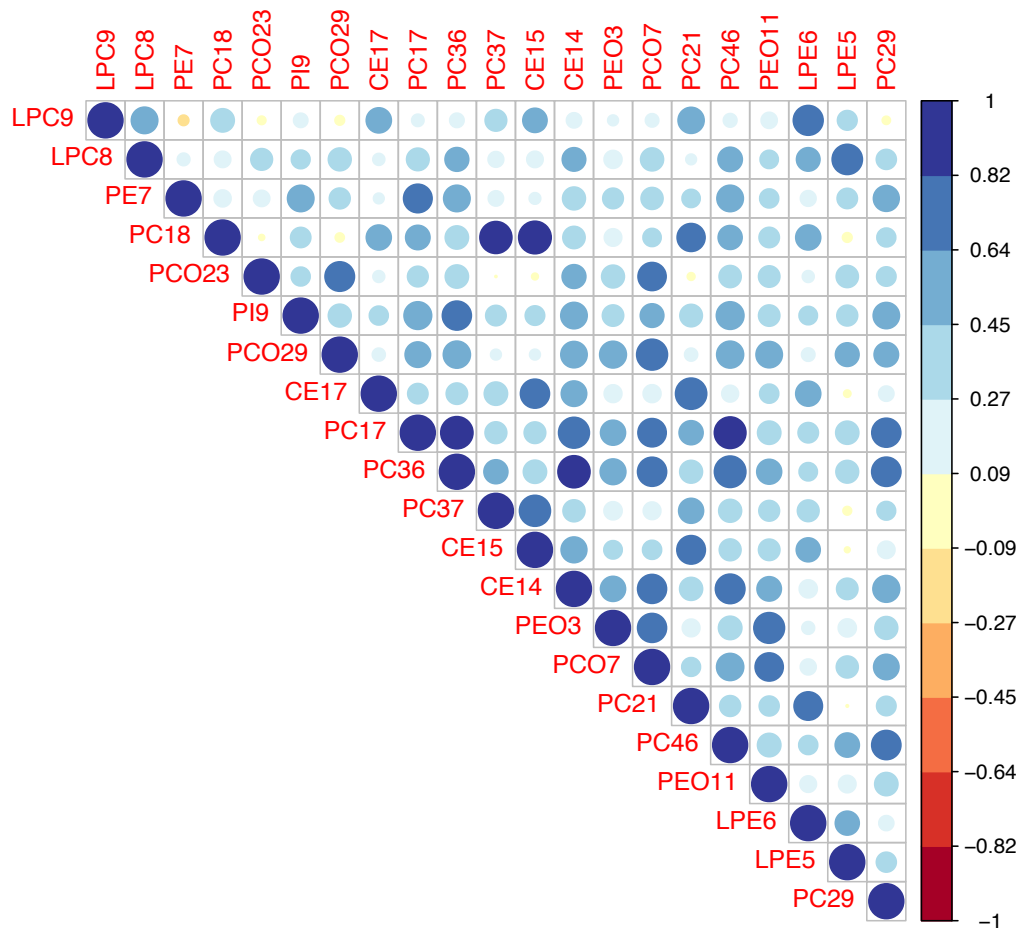

**Figure S2:** Correlation map of 21 heritable lipid traits computed from univariate beta coefficients using metaCCA.

MetaPhat detected significant associations at 433 SNPs ( $p < 5 \times 10^{-8}$ ) of which 7 independent variants, listed in Table S2, remained after clumping by a window of one million-base pairs. Clumping means that the set of independent variants was generated iteratively as follows: the variant with the smallest  $p$ -value  $< 5 \times 10^{-8}$  was added among the independent variants and all other variants within 1 Mb of the newly chosen variant were filtered out. This procedure was repeated until no genome-wide significant ( $p < 5 \times 10^{-8}$ ) variant remained.

#### Decomposition

Table S2 below lists the significant SNP associations and their decomposition results by MetaPhat using univariate GWAS summaries for the 21 lipid species (Table S1). Gene information is captured for these SNPs programmatically using an Ensembl (Hunt et al. 2018; GRCH37 and GRCH38 builds supported) resource lookup. Variants within 3,000 bases to a gene start codon site are labeled with the gene name and the exact base pair distance from the start codon (here 12:21414585:ATTTC:A\_2949\_SLCO1A2). Outside this 3,000 base-window and within 25K base-window, variants are labeled by the gene name and distance in kilo-bases(KB) (here 13:90477047:G:T\_13KB\_ENSG00000200733).

**Table S2:** List of 7 independent variants with their optimal and driver traits that are identified by MetaPhat in the multivariate analyses of 21 polyunsaturated lipid species.

| Variant Gene GRCH37 (RSID)                         | Sample missing | All traits Neg. log <sub>10</sub> (P value) | Optimal traits                                                       | Optimal Neg. log <sub>10</sub> (P value) | Drivers                                                                                                   |
|----------------------------------------------------|----------------|---------------------------------------------|----------------------------------------------------------------------|------------------------------------------|-----------------------------------------------------------------------------------------------------------|
| 11:61593005:G:A FADS2 (rs174567)                   | 1.3%           | 144.62                                      | LPC8_PE7_PI9_CE17_PC17_PC36_PC37_CE15_CE14_PEO3_PC21_PC46_PEO11_LPE5 | 148.70                                   | PC36_CE14_PC17_LPC8_PEO11_PEO3_LPE5_PC21_PC46_PC29_CE15_PC37_PC18_PCO7_PCO29_PCO23_PI9_PE7_CE17_LPC9_LPE6 |
| 11:116623213:TA:T BUD13 (rs66505542)               | 0.1%           | 7.81                                        | LPC9_PI9_PC36                                                        | 11.44                                    | PI9                                                                                                       |
| 12:21414585:ATTTC:A_2949_SLCO1A2 (rs146327691)     | 1.2%           | 7.37                                        | LPC9_PE7_LPE6_LPE5                                                   | 10.26                                    | LPE5                                                                                                      |
| 13:90477047:G:T 13KB_ENSG00000200733 (rs188167837) | 1.0%           | 7.53                                        | CE17_PC17_CE14_PC21                                                  | 8.32                                     | PC17                                                                                                      |
| 15:58678720:C:T ALDH1A2 (rs261290)                 | 0.6%           | 40.60                                       | PE7_PI9_PCO29_PC17_CE15_LPE6                                         | 46.87                                    | PE7                                                                                                       |
| 19:45412079:C:T APOE (rs7412)                      | 0              | 12.38                                       | PC18_PCO23_PC36_CE14                                                 | 17.82                                    | CE14_PCO23                                                                                                |
| 19:54677189:C:T MBOAT7 (rs8736)                    | 23.6%          | 49.04                                       | PE7_PI9_PC36_PCO7_PC46_LPE6                                          | 57.73                                    | PI9                                                                                                       |

Figure S3 repeats Figure 1A from the main text and shows the result of a variant in the *APOE* gene (rs7412) with the highest (green) and lowest (orange) p-value traces, from the full set of 21 traits through the iterated subsets that exclude one trait at a time until only a single trait remains. The highest trace optimizes for the highest association statistic (smallest p-value) whereas the lowest trace optimizes for the lowest association statistic (largest p-value). By following these traces, we can decompose the set of traits into smaller subsets of traits that contribute the most to the association statistic. To assist the interpretation, we define two concepts: *optimal traits* and *driver traits*.

We define the *optimal traits* (here PC18, PC36, CE14 and PCO23) as those that remain on the highest trace when the association statistic is increasing the last time. For this variant, it can be seen that after dropping LPC8 we have remaining Traits=4 and a negative log<sub>10</sub> p-value of 17.82, that is larger than at Traits=5 and also larger than at any value Traits<4. Thus those 4 traits form the set of *optimal traits*. Table S3 below lists the negative log<sub>10</sub> p-values from Traits 4 down to univariate statistics. We note that the lowest univariate p-value for this *APOE* variant for all 21 lipids is about 0.0001 and hence this variant was detected at significance level  $5 \times 10^{-8}$  only by applying a multivariate model.

We define the *driver traits* (here CE14 and PCO23) as those that have been removed on the lowest trace when the p-value first becomes non-significant ( $> 5 \times 10^{-8}$ ). Starting from the full model, (21 Traits), the negative log<sub>10</sub> p-value drops to 8.58 after dropping CE14 (20 Traits), and then to 5.74 after dropping PCO23 (19 Traits) which is below the genome-wide significance threshold ( $7.3 = -\log_{10}(5 \times 10^{-8})$ ). As it requires the removal of both CE14 and PCO23 to get below this threshold, these two traits thus formed the *driver traits*. For clarity, Table S4 below lists all the models and their p-values that MetaPhat considered when Traits=21, 20 or 19.

SNP:19:45412079\_APOE Traits:21\_Polyunsaturated\_Lipids

Optimal trait(s): PC18\_PCO23\_PC36\_CE14

Driver(s): CE14\_PCO23

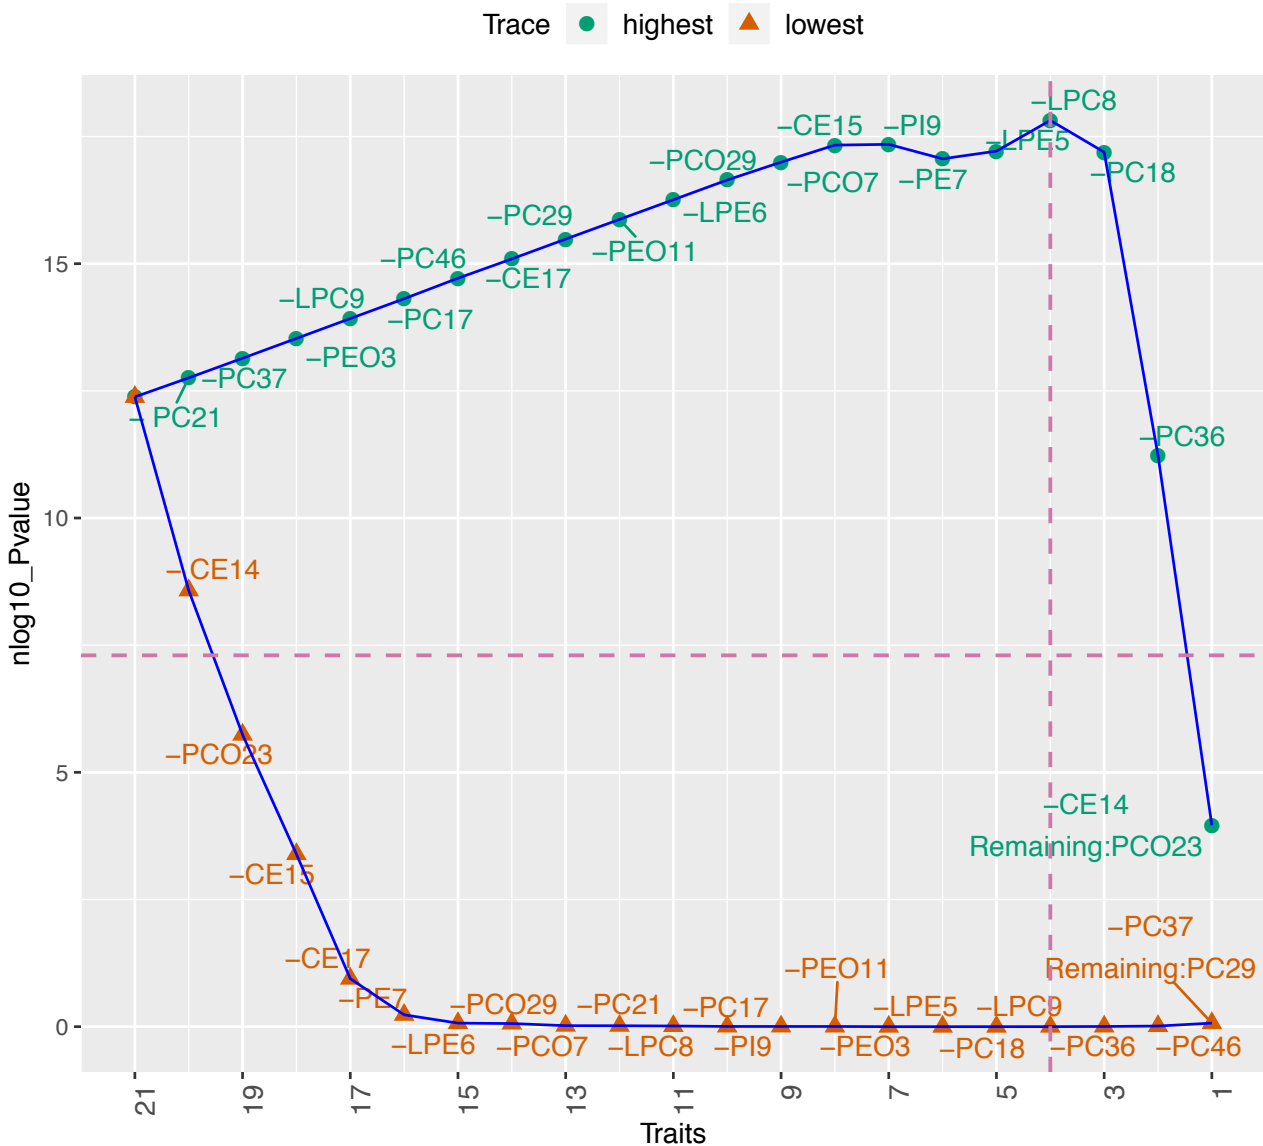

**Figure S3:** Trace plot of *APOE* variant rs7412 showing CE14 and PCO23 as the driver traits and LPC8, PC18, PC36, CE14 and PCO23 as the optimal traits.

**Table S3:** Defining optimal traits. Using the highest trace for *APOE* variant in Figure S3, MetaPhat detects PC18, PC36, CE14 and PCO23 as the optimal traits. The highest trace peaks after dropping LPC8 when 4 traits remain and begins a continuous descent, crossing the standard GWAS p-value  $5 \times 10^{-8}$  after PC36 is dropped and 2 traits PCO23 and CE14 remain. These two traits are also the driver traits defined by the lower trace (see Table S3). Table shows the association statistic ( $-\log_{10}$  p-value) for all combinations that MetaPhat considers after there are 5 traits left. The traits on the highest trace are shown in bold at each remaining iteration.

| Trait dropped | Neg. log <sub>10</sub> (p value) | Traits left                           |
|---------------|----------------------------------|---------------------------------------|
| None          | 12.75                            | Full model, 21 polyunsaturated lipids |
| LPE5          | 17.21                            | 5                                     |
| <b>LPC8</b>   | <b>17.82</b>                     | 4 (PC18_PCO23_PC36_CE14_LPE5)         |
| PC18          | 16.60                            | 4                                     |
| PC36          | 13.24                            | 4                                     |
| PCO23         | 10.59                            | 4                                     |
| CE14          | 3.23                             | 4                                     |

|              |                                                    |   |
|--------------|----------------------------------------------------|---|
| <b>PC18</b>  | <b>17.19</b>                                       | 3 |
| PC36         | 13.60                                              | 3 |
| PCO23        | 10.38                                              | 3 |
| CE14         | 3.70                                               | 3 |
| <b>PC36</b>  | <b>11.23</b>                                       | 2 |
| PCO23        | 11.04                                              | 2 |
| CE14         | 3.81                                               | 2 |
| <b>PCO23</b> | <b>3.96</b><br>(p-value 0.0001 in univariate GWAS) | 1 |
| CE14         | 3.36<br>(p-value 0.0004 in univariate GWAS)        | 1 |

**Table S4:** Defining driver traits. Using the lowest trace for *APOE* variant in Figure S3, MetaPhat detects CE14 and PCO23 as the driver traits. Dropping PCO23 provides the lowest  $-\log_{10}$  p-value out of all sets with 20 Traits followed by dropping CE14 to get to 19 traits. After these 2 traits were dropped, the p-value was no longer genome-wide significant and hence these two traits form the *driver traits*.

| Trait dropped | Neg. log <sub>10</sub> (p value) | Traits                                |
|---------------|----------------------------------|---------------------------------------|
| None          | 12.37                            | Full model, 21 polyunsaturated lipids |
| <b>CE14</b>   | <b>8.58</b>                      | <b>20</b>                             |
| PCO23         | 8.82                             | 20                                    |
| PC36          | 11.01                            | 20                                    |
| LPE5          | 11.88                            | 20                                    |
| LPC8          | 12.21                            | 20                                    |
| PE7           | 12.45                            | 20                                    |
| PI9           | 12.53                            | 20                                    |
| PC18          | 12.62                            | 20                                    |
| LPE6          | 12.63                            | 20                                    |
| PCO7          | 12.65                            | 20                                    |
| PEO11         | 12.65                            | 20                                    |
| PCO29         | 12.66                            | 20                                    |
| CE15          | 12.66                            | 20                                    |
| PC29          | 12.70                            | 20                                    |
| PC46          | 12.71                            | 20                                    |
| CE17          | 12.71                            | 20                                    |
| PC17          | 12.74                            | 20                                    |
| LPC9          | 12.75                            | 20                                    |
| PEO3          | 12.75                            | 20                                    |
| PC37          | 12.76                            | 20                                    |
| PC21          | 12.76                            | 20                                    |
| <b>PCO23</b>  | <b>5.74</b>                      | 19                                    |
| CE15          | 6.12                             | 19                                    |
| PC18          | 6.87                             | 19                                    |
| LPE5          | 7.97                             | 19                                    |
| CE17          | 8.05                             | 19                                    |
| PE7           | 8.08                             | 19                                    |
| PC17          | 8.31                             | 19                                    |
| PC36          | 8.43                             | 19                                    |
| PI9           | 8.52                             | 19                                    |
| LPC8          | 8.60                             | 19                                    |
| LPE6          | 8.71                             | 19                                    |
| PC46          | 8.73                             | 19                                    |
| PC21          | 8.76                             | 19                                    |
| PEO11         | 8.81                             | 19                                    |
| PCO29         | 8.84                             | 19                                    |
| PC29          | 8.87                             | 19                                    |

|      |      |    |
|------|------|----|
| PC37 | 8.89 | 19 |
| LPC9 | 8.90 | 19 |
| PEO3 | 8.90 | 19 |
| PCO7 | 8.90 | 19 |

This example showed that (1) we needed a multivariate test to detect association of *APOE* variant with lipid species and (2) only 2-4 of the 21 traits contribute to most of the multivariate association statistic. With MetaPhat we could seamlessly carry out both of these tasks from existing univariate GWAS summary statistics.

In addition to *APOE* variant, we found 6 other significant variants after clumping (Table S2). For 5 out of the 7 reported SNPs, the driver set has only one trait. Shown in the left panel of Figure S4, *BUD13* is clearly driven by trait PI9 while *FADS2* (Figure S4 right panel) variant decomposition resulted in 18 driver traits, including 8 traits that were also forming the optimal traits (LPC8, PE7, PEO3, PC17, PC36, PC37, CE15, CE14, PI9, PC21, PC46, PEO11, LPE5). Notably, *FADS2* is an essential gene for fatty acid metabolism (Lattka et al. 2010). Trait importance map of each of these 7 SNPs are shown in Figure S5 and the SNP similarity clusters are shown in Figure S6.

The detailed trace plots, cluster maps and tabular outputs are available at:

[https://sourceforge.net/projects/meta-pheno-association-tracer/files/test\\_outputs/21\\_polyunsaturated\\_lipids.tar.gz](https://sourceforge.net/projects/meta-pheno-association-tracer/files/test_outputs/21_polyunsaturated_lipids.tar.gz)

MetaPhat output formats and intermediate results are further described at:

<https://sourceforge.net/p/meta-pheno-association-tracer/wiki/output>

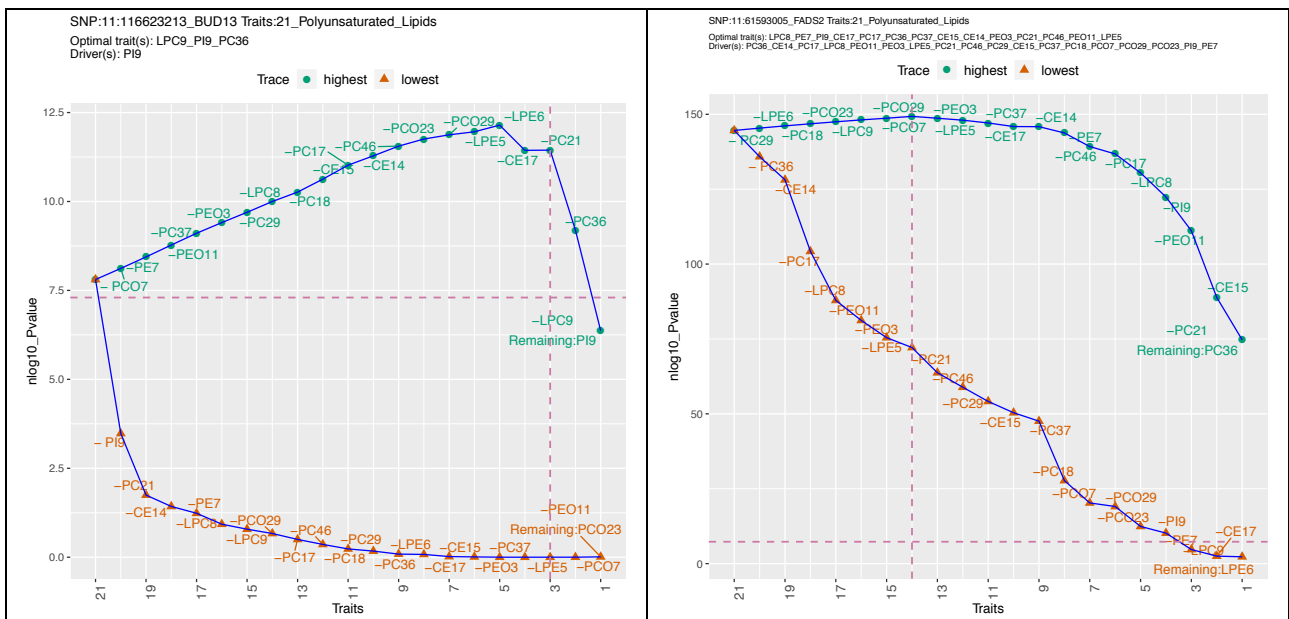

**Figure S4:** Decomposition of *BUD13* and *FADS2* variants. Like most of the decomposed variants (5 out of 7), *BUD13* variant association (left panel) is also driven by single trait-PI9. *FADS2* association (right panel) has the most complex signal, as there are 14 optimal traits and 18 driver traits. Notably, polyunsaturated lipids LPC8, PE7, PEO3, PC17, PC36, PC37, CE15, CE14, PI9, PC21, PC46, PEO11, LPE5 were found in both sets.



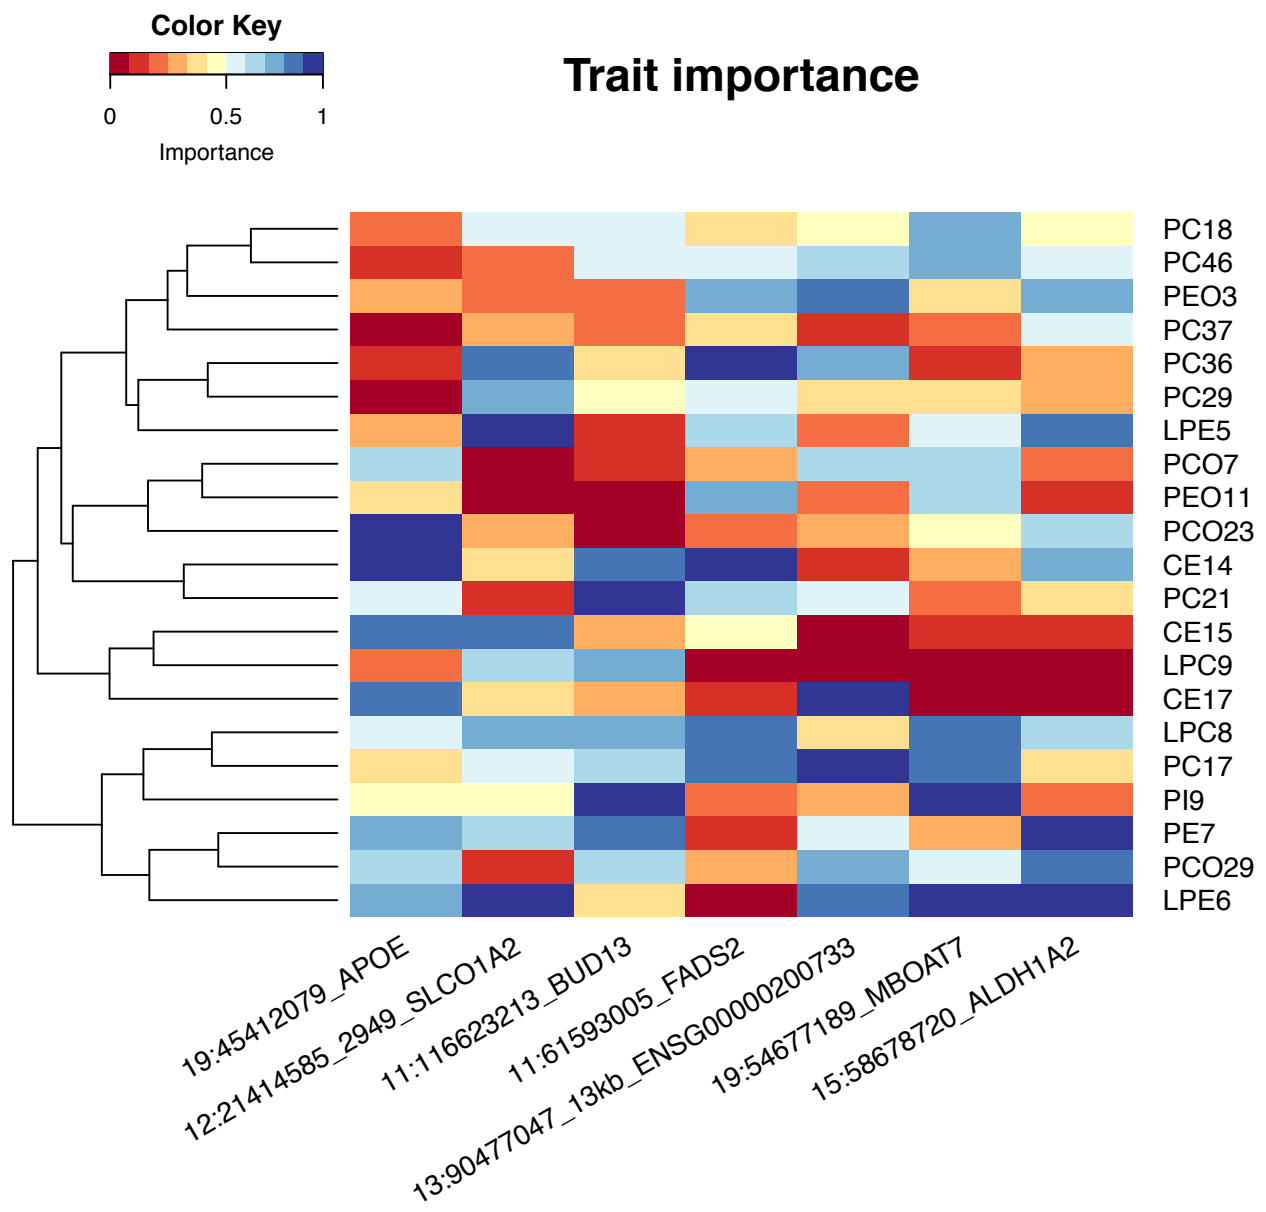

**Figure S5:** Trait importance map, color coded from more important (blue) to less important (red), for the 7 independent variants based on the rank of the traits on the lowest trace.

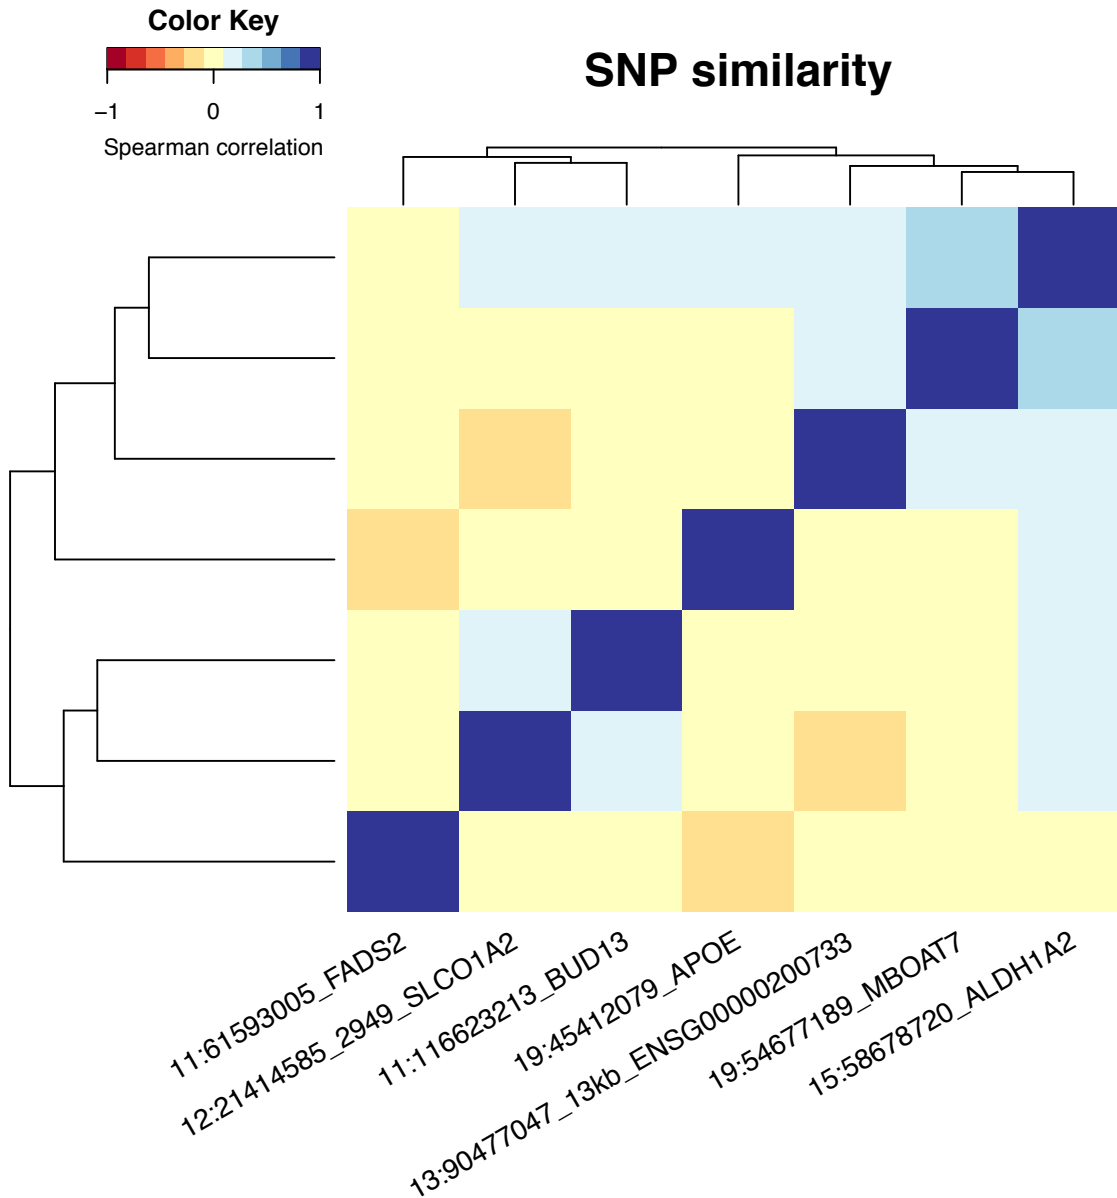

**Figure S6:** SNP similarities are based on clustering of trait importance in Figure S5. It can be seen that variants annotated to *ALDH1A2* (15:58678720) and *MBOAT7* (19:54677189) are positively correlated and hence could be linked through shared biological mechanisms.

### Computational performance

The present analysis of 21 polyunsaturated lipids with 8,576,290 SNPs took 157 minutes on a Google cloud Linux instance with 16 cores. The program parameters and performances are listed in Table S5. For comparison and running on the same cloud instance, a job using 4 essential lipids (HDL, LDL, TC and TG) and 2,161,631 variants from Global Lipids Genetics Consortium (GLGC) (Willer et al. 2013) took 45 minutes. Willer and colleagues reported 155 significant variants, including *APOE* rs7412 reported here. We detected 2,364 variants at a p-value cutoff of  $10^{-10}$  and these were clumped into 56 independent variants. The initial MetaPhat GLGC results, with decomposed trace plots, are available here:

[https://sourceforge.net/projects/meta-pheno-association-tracer/files/test\\_outputs/glgc\\_results.tar.gz/download](https://sourceforge.net/projects/meta-pheno-association-tracer/files/test_outputs/glgc_results.tar.gz/download)

**Table S5:** Example data sets of GWAS summaries and their processing times with MetaPhat.

| Data                                          | Phenotypes           | Subjects | Intersected SNPs | Time (Minutes) | Significant loci | Clumped Significant loci |
|-----------------------------------------------|----------------------|----------|------------------|----------------|------------------|--------------------------|
| Heritable polyunsaturated lipids <sup>1</sup> | 21                   | 2,045    | 8,576,290        | 157            | 433              | 7                        |
| Global Lipid Consortium <sup>2</sup>          | 4 (HDL, LDL, TG, TC) | 93,126   | 2,161,631        | 45             | 2,364            | 56                       |

1. --parallel 15, --chunks 10000, --waittime 40, --clump 1000000, --cutoff 7, -log10(0.0000001), maf:range 0.01:0.5

2. --parallel 15, --chunks 10000, --waittime 40, --clump 1000000, --cutoff 10, -log10(0.0000001), maf:range 0.01:0.5

## Program arguments

**Table S6:** The input switches of MetaPhat are shown with the --help option. Table below outlines the switches and their default values.

| Switches       | Description and default parameter value                                                                                                                                                                                                                                                                                                                                                                                                                      |
|----------------|--------------------------------------------------------------------------------------------------------------------------------------------------------------------------------------------------------------------------------------------------------------------------------------------------------------------------------------------------------------------------------------------------------------------------------------------------------------|
| --help         | Shows all arguments and lists relevant default values                                                                                                                                                                                                                                                                                                                                                                                                        |
| --phenotypes   | Required, parameter is a file that defines GWAS summary files for testing (key:full_path)<br><br>One summary file per line, in this format<br>pheno1:/path/summary1.gz<br>pheno2:/path/summary2.gz<br>...<br>See example:<br><a href="https://sourceforge.net/projects/meta-pheno-association-tracer/files/test_inputs/global_lipid_summaries2">https://sourceforge.net/projects/meta-pheno-association-tracer/files/test_inputs/global_lipid_summaries2</a> |
| --outlabel     | Required, defines a label for output files and plotting, must be alphanumeric and without spaces.                                                                                                                                                                                                                                                                                                                                                            |
| --nsamples     | Required, the number of subjects the GWAS summaries were based on.                                                                                                                                                                                                                                                                                                                                                                                           |
| --nsamples_dev | Optional, defines the allowed deviating percentage of missing samples for variants to be included in analysis. It only applies if N is defined in GWAS summaries. Defaults to .25 (25%, for example, if nsamples=1000, variants with N<750 or N>1250 will be excluded)                                                                                                                                                                                       |
| --chunksize    | Required, sets the number of SNPs processed by metaCCA on each batch. Defaults to 100000                                                                                                                                                                                                                                                                                                                                                                     |
| --parallel     | Required, defines the number of threads, or batch jobs, executed at the same time. The entry depends on your processor and whether it is shared. Defaults to 5.                                                                                                                                                                                                                                                                                              |
| --waittime     | Required, defines the number of seconds each batch submission approximately runs. Waittime depends on the chunksize and parallel threads. In our tests we have found that this should be around 120-180 seconds for chunks of 100000 and 6-8 threads on 16Gb 16Core nonshared environment. On shared server, we recommend using higher waittime. Defaults to 180.                                                                                            |
| --r1           | Optional, defines the output column from metaCCA by which to sort the variants during clumping. metaCCA outputs both r1 and pvalue. As pvalue can be set to INF for multiple variants within the same test trait set. We recommend using r1, the leading canonical correlation value. Defaults to 1.                                                                                                                                                         |
| --outdir       | Required, defines the complete path to store outputs.                                                                                                                                                                                                                                                                                                                                                                                                        |
| --gwascutoff   | Required, defines the pvalue cutoff, -1(math.log(pv, 10)). Defaults to 7.3, ~5e-8 which is the standard GWAS threshold                                                                                                                                                                                                                                                                                                                                       |
| --grch         | Optional, defines the human ENSEMBL (Hunt et al. 2018) build version, possible values are 37 and 38. Defaults to 37.                                                                                                                                                                                                                                                                                                                                         |

|              |                                                                                                                                                                                                                                                                                                                                                                                                                                                                                                                                                    |
|--------------|----------------------------------------------------------------------------------------------------------------------------------------------------------------------------------------------------------------------------------------------------------------------------------------------------------------------------------------------------------------------------------------------------------------------------------------------------------------------------------------------------------------------------------------------------|
| --exclude    | Optional, defines a file whose variants are excluded even if the variant is significant. One variant per line. See example:<br><a href="https://sourceforge.net/projects/meta-pheno-association-tracer/files/test_inputs/exclude.dat">https://sourceforge.net/projects/meta-pheno-association-tracer/files/test_inputs/exclude.dat</a>                                                                                                                                                                                                             |
| --interested | Optional, defines a file whose variants are included in the output results even if variant's pvalue does not pass the cutoff. One variant per line. See example:<br><a href="https://sourceforge.net/projects/meta-pheno-association-tracer/files/test_inputs/interested.list">https://sourceforge.net/projects/meta-pheno-association-tracer/files/test_inputs/interested.list</a>                                                                                                                                                                |
| --maf_range  | Optional, defines the variant frequency range min:max to include. Example values .01:.5, mean that variants with maf values >.5 and <.01 will be excluded. Only applies if all input GWAS summaries include this field, and the field column header needs to be effect_allele_frequency or maf. For possible guidelines, see UK Biobank (item 2):<br><a href="http://www.nealelab.is/blog/2017/9/11/details-and-considerations-of-the-uk-biobank-gwas">http://www.nealelab.is/blog/2017/9/11/details-and-considerations-of-the-uk-biobank-gwas</a> |
| --clump      | Required, defines the base-pair window to clump variants based on their pvalues/r1 canonical correlation values. Defaults to 500000.                                                                                                                                                                                                                                                                                                                                                                                                               |
| --neglogval  | Optional, defines the maximal negative log pvalue for INF values. Defaults to 400.                                                                                                                                                                                                                                                                                                                                                                                                                                                                 |
| --Rscript    | Required, defines the full path to Rscript executable. Defaults to /usr/bin/Rscript                                                                                                                                                                                                                                                                                                                                                                                                                                                                |

## GWAS summary format and headers

Univariate GWAS summary files need to follow existing EBI format standards:

<https://www.ebi.ac.uk/gwas/docs/methods/summary-statistics>

Additional information is provided here:

[https://sourceforge.net/p/meta-pheno-association-tracer/wiki/GWAS\\_summary\\_input/](https://sourceforge.net/p/meta-pheno-association-tracer/wiki/GWAS_summary_input/)

In addition, the summary files need to be in gzip format for efficiency reasons.

## Prerequisites

MetaPhat requires Python 2.7 and R 3.4+. The detailed installation instructions and package dependencies are listed here:

[https://sourceforge.net/p/meta-pheno-association-tracer/wiki/Install\\_dependencies/](https://sourceforge.net/p/meta-pheno-association-tracer/wiki/Install_dependencies/)

## Architecture and Performance

MetaPhat has been tested on shared Linux servers, MacBook laptops and Google cloud instances. The results reported have been processed from Google cloud instance with machine type n1-highmem-16. The specs are listed below:

```

Architecture:          x86_64
CPU op-mode(s):        32-bit, 64-bit
Byte Order:             Little Endian
CPU(s):                 16
On-line CPU(s) list:   0-15
Thread(s) per core:    2
Core(s) per socket:    8
Socket(s):              1
NUMA node(s):          1
Vendor ID:              GenuineIntel

```

CPU family: 6  
Model: 85  
Model name: Intel(R) Xeon(R) CPU @ 2.00GHz  
Stepping: 3  
CPU MHz: 2000.182

More details: <https://cloud.google.com/compute/docs/machine-types>

For smaller data sets, the standard memory instances are suitable. We recommend machines with higher number of CPUs for optimal multiprocessing performances.

## References

Cichonska A et al. (2016) metaCCA: summary statistics-based multivariate meta-analysis of genome-wide association studies using canonical correlation analysis. *Bioinformatics*. 2016;32(13):1981–1989. doi:10.1093/bioinformatics/btw052

Hunt S, McLaren W et al. (2018) Ensembl variation resources. Database Volume 2018, doi:10.1093/database/bay119

Hotelling H. (1936) Relations between two sets of variates. *Biometrika*, 28, 321–377.

Tabassum R et al. (2018) Genetics of human plasma lipidome: Understanding lipid metabolism and its link to diseases beyond traditional lipids  
bioRxiv 457960; doi: <https://doi.org/10.1101/457960>

Teslovich TM, Musunuru K, Smith AV, et al. Biological, clinical and population relevance of 95 loci for blood lipids. *Nature*. 2010;466(7307):707–713. doi:10.1038/nature09270.

Willer CJ et al. (2013) Discovery and refinement of loci associated with lipid levels. *Nat. Genet.* doi:10.1038/ng.2797
